# Supplementary material for: Canada-Denmark MRI scoring system of the spine in patients with axial spondyloarthritis: updated definitions, scoring rules and inter-reader reliability in a multiple reader setting
Source: PubMed Central journal article supplement — RMD Open. 2019 Oct 13;5(2):e001057. doi: 10.1136/rmdopen-2019-001057 (PMC6803003; doi:10.1136/rmdopen-2019-001057), 2019-10-13
Supplement: rmdopen-2019-001057supp001.pdf [file rmdopen-2019-001057supp001.pdf]

Supplementary material to “The Canada-Denmark MRI scoring system of the spine in patients with axial spondyloarthritis: updated definitions, scoring rules and inter-reader reliability in a multiple reader setting”

Supplementary Figure 1. Agreement plots with data from all 7 readers compared to the mean score of all readers (x-axes were transformed to allow better visualization of data clustering at low values using square root transformation).

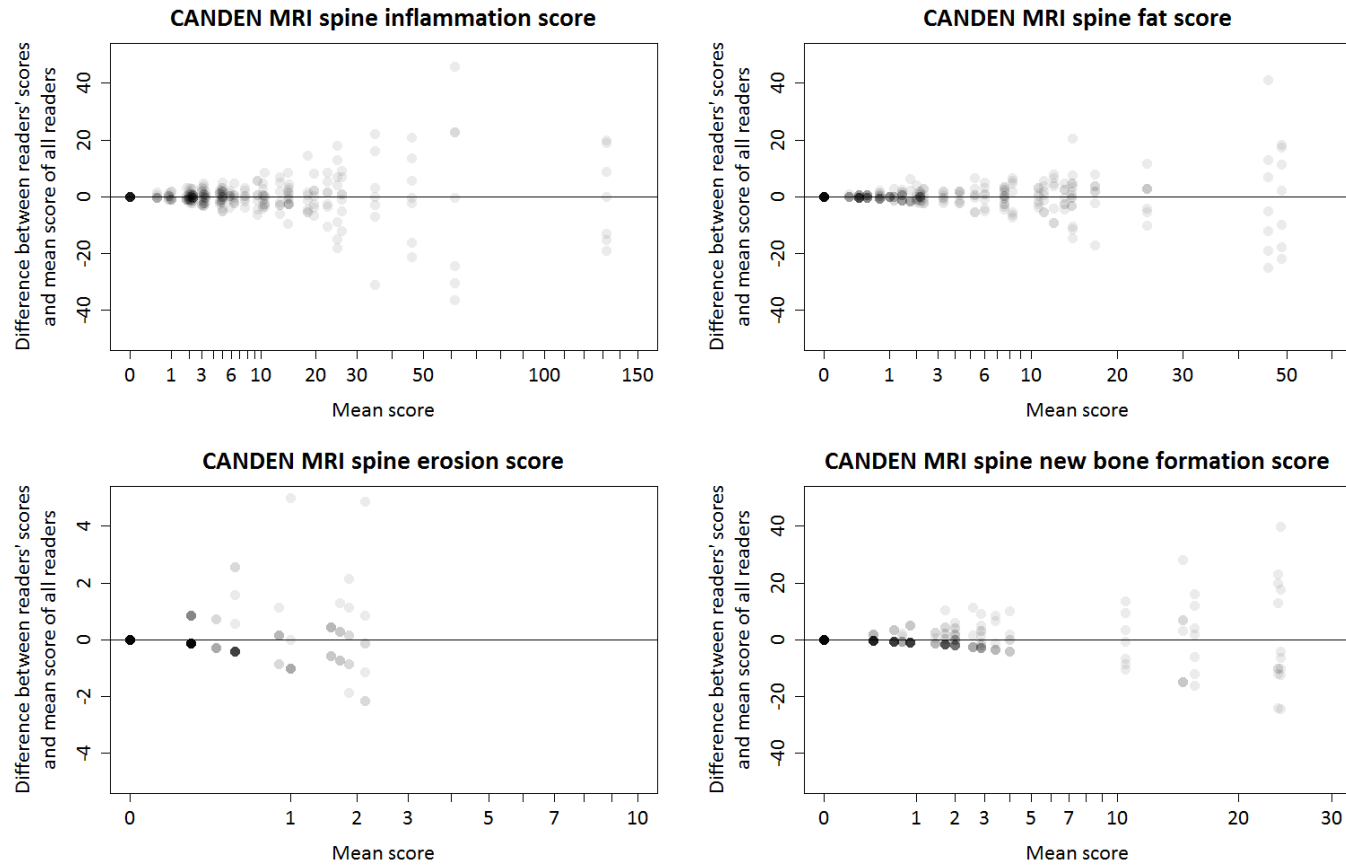

## Supplementary material to “The Canada-Denmark MRI scoring system of the spine in patients with axial spondyloarthritis: updated definitions, scoring rules and inter-reader reliability in a multiple reader setting”

Supplementary Table 1. Distribution of scores at baseline and change as assessed by each of the 7 readers

|                                                        |          | Reader 1                | Reader 2                | Reader 3              | Reader 4                | Reader 5               | Reader 6              | Reader 7                 |
|--------------------------------------------------------|----------|-------------------------|-------------------------|-----------------------|-------------------------|------------------------|-----------------------|--------------------------|
| CANDEN MRI spine inflammation score, range 0-614       | Baseline | 14.6 (3; 1-16)          | 14.3 (5; 2-14)          | 10.8 (6; 2-9)         | 12.6 (4; 0-16)          | 14.5 (7; 2-14)         | 11.8 (5; 2-12)        | 14.0 (6; 2-15)           |
|                                                        | Change   | -12.3<br>(-2; -12 to 0) | -11.2<br>(-3; -13 to 0) | -8.6<br>(-3; -8 to 0) | -10.4<br>(-3; -12 to 0) | -12.1<br>(-3; -9 to 0) | -9.1<br>(-3; -9 to 0) | -11.9<br>(-4; -12 to -1) |
| CANDEN MRI spine fat score, range 0-510                | Baseline | 4.3 (0; 0-4)            | 9.4 (2; 0-11)           | 8.1 (4; 1-10)         | 5.0 (1; 0-8)            | 8.2 (3; 1-11)          | 5.4 (1; 0-6)          | 7.6 (2; 0-9)             |
|                                                        | Change   | 1.1 (0; 0-1)            | 1.6 (1; 0-2)            | 1.6 (0; 0-3)          | 1.2 (0; 0-1)            | 1.6 (0; 0-3)           | 1.4 (1; 0-2)          | 1.9 (0; 0-3)             |
| CANDEN MRI spine bone erosion score, range 0-208       | Baseline | 0.2 (0; 0-0)            | 0.6 (0; 0-1)            | 0.2 (0; 0-0)          | 0.3 (0; 0-0)            | 0.1 (0; 0-0)           | 0.3 (0; 0-0)          | 0.5 (0; 0-0)             |
|                                                        | Change   | -0.1 (0; 0-0)           | 0.0 (0; 0-0)            | 0.0 (0; 0-0)          | 0.0 (0; 0-0)            | -0.1 (0; 0-0)          | -0.1 (0; 0-0)         | -0.3 (0; 0-0)            |
| CANDEN MRI spine new bone formation score, range 0-460 | Baseline | 4.1 (0; 0-2)            | 5.7 (0; 0-6)            | 2.5 (0; 0-4)          | 2.4 (0; 0-2)            | 0.4 (0; 0-0)           | 3.2 (0; 0-3)          | 3.5 (0; 0-0)             |
|                                                        | Change   | 0.0 (0; 0-0)            | 0.4 (0; 0-0)            | 0.4 (0; 0-0)          | -0.1 (0; 0-0)           | 0.0 (0; 0-0)           | 0.0 (0; 0-0)          | 1.0 (0; 0-0)             |

Scores are reported as mean (median; range). CANDEN, Canada-Denmark; MRI, magnetic resonance imaging.

## Supplementary material to “The Canada-Denmark MRI scoring system of the spine in patients with axial spondyloarthritis: updated definitions, scoring rules and inter-reader reliability in a multiple reader setting”

Supplementary Table 2. Components of the CANDEN MRI spine inflammation score: Scores and inter-reader reliability.

|                                               | ----- Baseline ----- |                                |                    |                     |                       | ----- Change at week 52 ----- |                    |                     |                       |                        |
|-----------------------------------------------|----------------------|--------------------------------|--------------------|---------------------|-----------------------|-------------------------------|--------------------|---------------------|-----------------------|------------------------|
|                                               | Score                | Percentage with score $\geq 1$ | Single-measure ICC | Average-measure ICC | Kappa at lesion-level | Score                         | Single-measure ICC | Average-measure ICC | Kappa at lesion level | Wilcoxon test, p-value |
| All sites                                     | 13.2 (5; 0-132)      | 85%                            | 0.91               | 0.95                | 0.60                  | -10.8 (-3; -113 to 1)         | 0.88               | 0.94                | 0.47                  | <0.001                 |
| Vertebral body corner inflammation subscore   | 8.0 (3; 0-89)        | 80%                            | 0.93               | 0.97                | 0.68                  | -6.4 (-2; -75 to 1)           | 0.90               | 0.95                | 0.53                  | <0.001                 |
| Spondylodiscitis subscore                     | 1.8 (0; 0-25)        | 28%                            | 0.84               | 0.91                | 0.64                  | -1.3 (0; -22 to 0)            | 0.82               | 0.90                | 0.48                  | 0.003                  |
| Facet joint inflammation subscore             | 1.0 (0; 0-13)        | 20%                            | 0.78               | 0.88                | 0.45                  | -0.8 (0; -13 to 2)            | 0.79               | 0.88                | 0.45                  | 0.001                  |
| Posterolateral elements inflammation subscore | 2.4 (0; 0-19)        | 35%                            | 0.55               | 0.71                | 0.30                  | -2.2 (0; -18 to 1)            | 0.55               | 0.71                | 0.28                  | <0.001                 |
| Vertebral bodies subscore                     | 10.2 (4; 0-118)      | 80%                            | 0.93               | 0.96                | 0.66                  | -8.1 (-2; -100 to 1)          | 0.91               | 0.95                | 0.51                  | <0.001                 |
| Posterior elements subscore                   | 3.0 (0; 0-27)        | 40%                            | 0.72               | 0.84                | 0.36                  | -2.7 (0; -26 to 3)            | 0.74               | 0.85                | 0.37                  | <0.001                 |
| Anterior corner lesions                       | 3.7 (2; 0-24)        | 75%                            | 0.89               | 0.94                | 0.72                  | -2.4 (-1; -19 to 3)           | 0.81               | 0.89                | 0.54                  | <0.001                 |
| Posterior corner lesions                      | 1.9 (0; 0-35)        | 33%                            | 0.93               | 0.97                | 0.69                  | -1.7 (0; -32 to 0)            | 0.92               | 0.96                | 0.54                  | <0.001                 |
| Anterolateral vertebral body lesions          | 2.3 (0; 0-29)        | 30%                            | 0.86               | 0.93                | 0.54                  | -2.1 (0; -24 to 0)            | 0.81               | 0.90                | 0.49                  | <0.001                 |
| Posterolateral vertebral body lesions         | 0.5 (0; 0-4)         | 20%                            | 0.20               | 0.33                | 0.14                  | -0.4 (0; -3 to 0)             | 0.22               | 0.36                | 0.11                  | <0.001                 |
| Transverse process                            | 0.7 (0; 0-6)         | 23%                            | 0.47               | 0.64                | 0.40                  | -0.6 (0; -6 to 0)             | 0.47               | 0.64                | 0.39                  | 0.002                  |
| Rib                                           | 1.1 (0; 0-8)         | 25%                            | 0.44               | 0.62                | 0.28                  | -1.0 (0; -7 to 0)             | 0.46               | 0.63                | 0.27                  | 0.002                  |
| Spinous process                               | 0.1 (0; 0-1)         | 0%                             | 0.26               | 0.41                | 0.00                  | 0.0 (0; -1 to 0)              | 0.29               | 0.45                | 0.00                  | 0.438                  |
| Soft tissue                                   | 0.2 (0; 0-4)         | 8%                             | 0.36               | 0.53                | 0.16                  | -0.2 (0; -3 to 0)             | 0.39               | 0.57                | 0.12                  | 0.004                  |

Scores are mean (median; range) using the average score of all readers. ICCs and kappa values are reported as the median of 21 pairwise combinations of readers. Wilcoxon test for change between baseline and week 52. At baseline, agreement by unweighted kappa for corner lesion type a vs. corner lesion type b was median 0.37 (inter-quartile range 0.23-0.52) when limited to anterior or posterior corners where both readers had judged corner lesion as present. Vertebral body corner inflammation subscore is the sum of anterior and posterior corner lesions, anterolateral lesions and posterolateral vertebral body lesions (posterolateral vertebral lesions only at level T12/L1 to L5/S1). Spondylodiscitis subscore is the sum of non-corner vertebral body lesions. Facet joint inflammation subscore is the sum of facet joint lesions. Posterolateral elements inflammation subscore is the sum of rib, transverse process, spinous process, soft tissue inflammation and posterolateral vertebral body lesions (posterolateral vertebral body only at levels C7/T1 to T11/T12).

## Supplementary material to “The Canada-Denmark MRI scoring system of the spine in patients with axial spondyloarthritis: updated definitions, scoring rules and inter-reader reliability in a multiple reader setting”

Supplementary Table 3. Components of the CANDEN MRI spine fat score, the CANDEN MRI spine bone erosion score, and the CANDEN MRI spine new bone formation score: Scores and inter-reader reliability.

|                                                  | ----- Baseline ----- |                           |                    |                     |                       | ----- Change at week 52 ----- |                    |                     |                       |                        |
|--------------------------------------------------|----------------------|---------------------------|--------------------|---------------------|-----------------------|-------------------------------|--------------------|---------------------|-----------------------|------------------------|
|                                                  | Score                | Percentage with score ≥ 1 | Single-measure ICC | Average-measure ICC | Kappa at lesion level | Score                         | Single-measure ICC | Average-measure ICC | Kappa at lesion level | Wilcoxon test, P-value |
| <b>Fat:</b>                                      |                      |                           |                    |                     |                       |                               |                    |                     |                       |                        |
| All sites                                        | 6.8 (2; 0-49)        | 65%                       | 0.79               | 0.89                | 0.55                  | 1.5 (0; -4 to 11)             | 0.59               | 0.74                | 0.22                  | <0.001                 |
| Vertebral body corner fat metaplasia subscore    | 5.8 (2; 0-48)        | 63%                       | 0.82               | 0.90                | 0.56                  | 1.1 (0; -3 to 7)              | 0.54               | 0.70                | 0.24                  | 0.002                  |
| Spondylodiscitis related fat metaplasia subscore | 0.9 (0; 0-6)         | 28%                       | 0.49               | 0.66                | 0.49                  | 0.3 (0; -2 to 4)              | 0.57               | 0.72                | 0.48                  | 0.131                  |
| Facet joint fat metaplasia subscore              | 0.1 (0; 0-2)         | 3%                        | 0.00               | 0.00                | 0.00                  | 0.0 (0; 0 to 1)               | 0.00               | 0.00                | 0.00                  | 0.292                  |
| Costovertebral joint fat metaplasia subscore     | 0.1 (0; 0-2)         | 5%                        | 0.10               | 0.19                | 0.00                  | 0.1 (0; 0 to 1)               | 0.02               | 0.04                | 0.00                  | 0.107                  |
| Vertebral bodies subscore                        | 6.7 (2; 0-48)        | 65%                       | 0.81               | 0.89                | 0.55                  | 1.4 (0; -4 to 11)             | 0.59               | 0.74                | 0.23                  | 0.001                  |
| Anterior corner lesions                          | 2.7 (1; 0-15)        | 55%                       | 0.73               | 0.84                | 0.58                  | 0.7 (0; -3 to 5)              | 0.52               | 0.69                | 0.33                  | 0.003                  |
| Posterior corner lesions                         | 1.5 (0; 0-17)        | 25%                       | 0.83               | 0.91                | 0.61                  | 0.2 (0; -1 to 3)              | 0.29               | 0.45                | 0.22                  | 0.071                  |
| Anterolateral vertebral body lesions             | 1.3 (0; 0-19)        | 18%                       | 0.81               | 0.89                | 0.47                  | 0.1 (0; 0 to 2)               | 0.11               | 0.20                | 0.09                  | 0.043                  |
| Posterolateral vertebral body lesions            | 0.3 (0; 0-3)         | 15%                       | 0.35               | 0.52                | 0.15                  | 0.1 (0; 0 to 1)               | 0.25               | 0.40                | 0.11                  | 0.020                  |
| <b>Erosion:</b>                                  |                      |                           |                    |                     |                       |                               |                    |                     |                       |                        |
| All sites                                        | 0.3 (0; 0-2)         | 13%                       | 0.38               | 0.55                | 0.40                  | -0.1 (0; -1 to 0)             | 0.01               | 0.01                | 0.00                  | 0.444                  |
| Vertebral bodies subscore                        | 0.3 (0; 0-2)         | 10%                       | 0.40               | 0.57                | 0.45                  | -0.1 (0; -1 to 0)             | 0.01               | 0.01                | 0.00                  | 0.260                  |
| Anterior corner lesions                          | 0.3 (0; 0-2)         | 10%                       | 0.42               | 0.59                | 0.45                  | -0.1 (0; -1 to 0)             | 0.05               | 0.10                | 0.00                  | 0.455                  |
| Posterior corner lesions                         | 0.0 (0; 0-0)         | 0%                        | 0.00               | 0.00                | 0.00                  | 0.0 (0; 0 to 0)               | 0.00               | 0.00                | 0.00                  | 1.000                  |
| Non-corner lesions                               | 0.5 (0; 0-5)         | 15%                       | 0.45               | 0.62                | 0.41                  | -0.1 (0; -1 to 0)             | 0.00               | 0.00                | 0.00                  | 0.104                  |
| Anterolateral lesions                            | 0.0 (0; 0-0)         | 0%                        | 0.00               | 0.00                | 0.00                  | 0.0 (0; 0 to 0)               | 0.00               | 0.00                | 0.00                  | 1.000                  |
| Posterolateral lesions                           | 0.0 (0; 0-0)         | 0%                        | 0.00               | 0.00                | 0.00                  | 0.0 (0; 0 to 0)               | 0.00               | 0.00                | 0.00                  | 1.000                  |
| Facet joint                                      | 0.0 (0; 0-1)         | 0%                        | 0.00               | 0.00                | 0.00                  | 0.0 (0; -1 to 0)              | 0.00               | 0.00                | 0.00                  | 1.000                  |
| <b>New bone formation:</b>                       |                      |                           |                    |                     |                       |                               |                    |                     |                       |                        |
| All sites                                        | 3.1 (1; 0-24)        | 43%                       | 0.39               | 0.56                | 0.28                  | 0.2 (0; -1 to 3)              | 0.00               | 0.00                | 0.00                  | 0.047                  |
| Vertebral bodies subscore                        | 2.9 (1; 0-24)        | 43%                       | 0.42               | 0.59                | 0.25                  | 0.2 (0; -1 to 3)              | 0.00               | 0.00                | 0.00                  | 0.047                  |
| Anterior corner lesions                          | 1.8 (0; 0-15)        | 35%                       | 0.57               | 0.72                | 0.39                  | 0.2 (0; -1 to 2)              | 0.00               | 0.00                | 0.00                  | 0.066                  |
| Posterior corner lesions                         | 1.0 (0; 0-15)        | 13%                       | 0.01               | 0.03                | 0.00                  | 0.1 (0; 0 to 3)               | 0.00               | 0.00                | 0.00                  | 0.174                  |
| Non-corner lesions                               | 0.1 (0; 0-3)         | 3%                        | 0.00               | 0.00                | 0.00                  | 0.0 (0; 0 to 0)               | 0.00               | 0.00                | 0.00                  | 1.000                  |
| Facet joint                                      | 0.2 (0; 0-6)         | 5%                        | 0.00               | 0.00                | 0.00                  | 0.0 (0; 0 to 0)               | 0.00               | 0.00                | 0.00                  | 1.000                  |

Scores are mean (median; range) using the average score of all readers. ICCs and kappa values are reported as the median of 21 pairwise combinations of readers. Wilcoxon test for change between baseline and week 52. Vertebral body corner fat metaplasia is the sum of anterior and posterior corner lesions, anterolateral lesions and posterolateral lesions (posterolateral lesions only at level T12/L1 to L5/S1). Spondylodiscitis related fat metaplasia subscore is the sum of non-corner vertebral body lesions. Facet joint fat metaplasia subscore is the sum of facet joint lesions. Costovertebral joint fat metaplasia subscore is the sum of posterolateral vertebral body lesions at levels C7/T1 to T11/T12. Erosion scores for vertebral bodies subscore only include anterior and posterior corner lesions, erosion scores for all sites only include anterior and posterior corner lesions and facet joints, i.e. non-corner lesions and anterolateral and posterolateral corner lesions are not included. For kappa values, anterior corner, posterior corner and non-corner ankylosis was taken to be the combination of two opposing corners with a score of 3, to allow sites with syndesmophytes with a score of 2, sites with ankylosis with a score of 3 as well as sites with no new bone formation to be combined in the analyses.
